# Supplementary material
Source: publisher figshare collection journal article supplement (https://springernature.figshare.com/ndownloader/files/13158626)
Supplement: Supplementary file 1 [file 13158626]

id	X	Y	FOLK_AND_WARD_METHOD_�m_MEAN	FOLK_AND_WARD_METHOD_�m_SORTING	FOLK_AND_WARD_METHOD_SKEWNESS	FOLK_AND_WARD_METHOD_KURTOSIS	FOLK_AND_WARD_METHOD_description_MEAN	FOLK_AND_WARD_METHOD_description_SORTING	FOLK_AND_WARD_METHOD_description_SKEWNESS	FOLK_AND_WARD_METHOD_description_KURTOSIS	PERCENT_OF_GRAVEL	PERCENT_OF_SAND	PERCENT_OF_MUD	PERCENT_OF_V_COARSE_GRAVEL	PERCENT_OF_COARSE_GRAVEL	PERCENT_OF_MEDIUM_GRAVEL	PERCENT_OF_FINE_GRAVEL	PERCENT_OF_V_FINE_GRAVEL	PERCENT_OF_V_COARSE_SAND	PERCENT_OF_COARSE_SAND	PERCENT_OF_MEDIUM_SAND	PERCENT_OF_FINE_SAND	PERCENT_OF_V_FINE_SAND	PERCENT_OF_V_COARSE_SILT	PERCENT_OF_COARSE_SILT	PERCENT_OF_MEDIUM_SILT	PERCENT_OF_FINE_SILT	PERCENT_OF_V_FINE_SILT	PERCENT_OF_CLAY
1	650393	655141	642.61	3.41	-0.28	1.84	Coarse_Sand	Poorly_Sorted	Fine_Skewed	Very_Leptokurtic	0.12	0.77	0.11	0	0	0	0	0.12	0.14	0.38	0.2	0.04	0.01	0.02	0.02	0.02	0.02	0.02	0.02
2	650692	655968	342.2	7.83	-0.65	0.53	Medium_Sand	Very_Poorly_Sorted	Very_Fine_Skewed	Very_Platykurtic	0.28	0.43	0.28	0	0	0	0	0.28	0.1	0.31	0	0	0.01	0.05	0.05	0.05	0.05	0.05	0.05
3	650660	656349	178.69	6.13	-0.43	0.84	Fine_Sand	Very_Poorly_Sorted	Very_Fine_Skewed	Platykurtic	0.03	0.69	0.28	0	0	0	0	0.03	0.1	0.26	0.18	0.09	0.06	0.05	0.05	0.05	0.05	0.05	0.05
4	650888	656374	687.73	5.88	-0.68	1.21	Coarse_Sand	Very_Poorly_Sorted	Very_Fine_Skewed	Leptokurtic	0.35	0.49	0.15	0	0	0	0	0.35	0.23	0.16	0.03	0.03	0.05	0.03	0.03	0.03	0.03	0.03	0.03
5	650932	656333	479.93	6.89	-0.67	0.68	Medium_Sand	Very_Poorly_Sorted	Very_Fine_Skewed	Platykurtic	0.31	0.48	0.2	0	0	0	0	0.31	0.19	0.2	0.03	0.03	0.05	0.03	0.03	0.03	0.03	0.03	0.03
6	650064	656793	163.93	3.91	-0.09	1.47	Fine_Sand	Poorly_Sorted	Symmetrical	Leptokurtic	0.05	0.78	0.17	0	0	0	0	0.05	0.03	0.08	0.2	0.27	0.21	0.03	0.03	0.03	0.03	0.03	0.03
7	649688	656264	93.69	3.98	-0.49	0.95	Very_Fine_Sand	Poorly_Sorted	Very_Fine_Skewed	Mesokurtic	0	0.7	0.3	0	0	0	0	0	0	0.01	0.23	0.35	0.1	0.05	0.05	0.05	0.05	0.05	0.05
8	650690	656302	115.41	10.41	0.3	0.55	Very_Fine_Sand	Very_Poorly_Sorted	Coarse_Skewed	Very_Platykurtic	0.2	0.26	0.54	0	0	0	0	0.2	0.04	0.14	0.02	0.02	0.04	0.09	0.09	0.09	0.09	0.09	0.09
9	649519	656700	37.92	4.15	0.02	0.76	Very_Coarse_Silt	Very_Poorly_Sorted	Symmetrical	Platykurtic	0	0.39	0.61	0	0	0	0	0	0.02	0	0.05	0.17	0.14	0.1	0.1	0.1	0.1	0.1	0.1
10	649606	656587	101.84	6.36	-0.22	0.9	Very_Fine_Sand	Very_Poorly_Sorted	Fine_Skewed	Mesokurtic	0.06	0.57	0.38	0	0	0	0	0.06	0.04	0.07	0.2	0.19	0.07	0.06	0.06	0.06	0.06	0.06	0.06
11	650716	655528	41.81	5.62	0.19	1.02	Very_Coarse_Silt	Very_Poorly_Sorted	Coarse_Skewed	Mesokurtic	0.03	0.36	0.61	0	0	0	0	0.03	0.07	0.04	0.02	0.09	0.14	0.1	0.1	0.1	0.1	0.1	0.1
12	650434	655494	49.88	4.13	-0.2	0.8	Very_Coarse_Silt	Very_Poorly_Sorted	Fine_Skewed	Platykurtic	0	0.5	0.49	0	0	0	0	0	0.01	0.01	0.07	0.2	0.21	0.08	0.08	0.08	0.08	0.08	0.08
13	650578	655343	39.63	4.29	0	0.85	Very_Coarse_Silt	Very_Poorly_Sorted	Symmetrical	Platykurtic	0	0.41	0.58	0	0	0	0	0	0.03	0.02	0.04	0.14	0.19	0.1	0.1	0.1	0.1	0.1	0.1
14	649845	656733	81.64	6.44	-0.02	0.89	Very_Fine_Sand	Very_Poorly_Sorted	Symmetrical	Platykurtic	0.05	0.53	0.43	0	0	0	0	0.05	0.04	0.08	0.1	0.16	0.14	0.07	0.07	0.07	0.07	0.07	0.07
15	649907	656274	330.14	2.34	0.19	1.36	Medium_Sand	Poorly_Sorted	Coarse_Skewed	Leptokurtic	0.05	0.92	0.02	0	0	0	0	0.05	0.06	0.1	0.41	0.31	0.04	0	0	0	0	0	0
16	650482	656393	58.07	5.21	-0.01	0.74	Very_Coarse_Silt	Very_Poorly_Sorted	Symmetrical	Platykurtic	0	0.49	0.51	0	0	0	0	0	0	0.08	0.15	0.13	0.12	0.09	0.09	0.09	0.09	0.09	0.09
17	650814	656518	320.97	5.4	-0.36	1.43	Medium_Sand	Very_Poorly_Sorted	Very_Fine_Skewed	Leptokurtic	0.07	0.76	0.17	0	0	0	0	0.07	0.15	0.26	0.22	0.1	0.03	0.03	0.03	0.03	0.03	0.03	0.03
18	650770	656572	799.94	4.07	-0.32	1.73	Coarse_Sand	Very_Poorly_Sorted	Very_Fine_Skewed	Very_Leptokurtic	0.22	0.67	0.11	0	0	0	0	0.22	0.2	0.35	0.08	0.03	0.02	0.02	0.02	0.02	0.02	0.02	0.02
19	650457	655921	273.33	3.05	-0.44	1.71	Medium_Sand	Poorly_Sorted	Very_Fine_Skewed	Very_Leptokurtic	0	0.88	0.12	0	0	0	0	0	0	0.24	0.44	0.13	0.06	0.02	0.02	0.02	0.02	0.02	0.02
20	650723	655435	296.44	2.97	-0.26	2.51	Medium_Sand	Poorly_Sorted	Fine_Skewed	Very_Leptokurtic	0.04	0.84	0.12	0	0	0	0	0.04	0.06	0.08	0.52	0.18	0.01	0.02	0.02	0.02	0.02	0.02	0.02
21	650675	656021	277.98	7.49	-0.51	0.87	Medium_Sand	Very_Poorly_Sorted	Very_Fine_Skewed	Platykurtic	0.1	0.65	0.26	0	0	0	0	0.1	0.18	0.32	0.02	0.05	0.07	0.04	0.04	0.04	0.04	0.04	0.04
22	650873	656471	554.19	3.68	0.03	1.98	Coarse_Sand	Poorly_Sorted	Symmetrical	Very_Leptokurtic	0.11	0.76	0.13	0	0	0	0	0.11	0.13	0.2	0.41	0.01	0.01	0.02	0.02	0.02	0.02	0.02	0.02
